# Supplementary material
Source: Research Square preprint supplement (doi:10.21203/rs.3.rs-8704501/v1)
Supplement: Supplementary file 1 [file 727c7249bd79fa9f274f59c3.docx]

**Searching strategies**

| PubMed | | |
| --- | --- | --- |
| #1 | "Brain Neoplasms"[MeSH Terms] | 186495 |
| #2 | "Glioma"[MeSH Terms] | 109743 |
| #3 | "Meningioma"[MeSH Terms] | 22805 |
| #4 | "Pituitary Neoplasms"[MeSH Terms] | 32080 |
| #5 | "Craniopharyngioma"[MeSH Terms] | 5280 |
| #6 | "Intracranial Aneurysm"[MeSH Terms] | 34165 |
| #7 | (((((((((((((((((((((((((((((((((((((((((((((brain cancer*[Title/Abstract]) OR (brain carcinoma*[Title/Abstract])) OR (brain malign*[Title/Abstract])) OR (brain neoplasm*[Title/Abstract])) OR (brain tumor*[Title/Abstract])) OR (Brain Stem neoplasm*[Title/Abstract])) OR (Brain Stem tumor*[Title/Abstract])) OR (cancer of brain[Title/Abstract])) OR (cancer of the brain[Title/Abstract])) OR (cancer of the central nervous system[Title/Abstract])) OR (central nervous system cancer*[Title/Abstract])) OR (central nervous system malignan*[Title/Abstract])) OR (central nervous system neoplasm*[Title/Abstract])) OR (central nervous system tumor*[Title/Abstract])) OR (Cerebellar cancer[Title/Abstract])) OR (Cerebellar neoplasm[Title/Abstract])) OR (Cerebellar tumor*[Title/Abstract])) OR (cerebral cancer*[Title/Abstract])) OR (cerebral carcinoma*[Title/Abstract])) OR (cerebral malignan*[Title/Abstract])) OR (cerebral neoplasm*[Title/Abstract])) OR (cerebral* tumor*[Title/Abstract])) OR (ependymom*[Title/Abstract])) OR (ganglioglioma*[Title/Abstract])) OR (glioma*[Title/Abstract])) OR (hypothalamic neoplasm*[Title/Abstract])) OR (hypothalamic tumor[Title/Abstract])) OR (intracerebral cancer*[Title/Abstract])) OR (intracerebral malignan*[Title/Abstract])) OR (intracerebral neoplasm*[Title/Abstract])) OR (intracerebral tumor*[Title/Abstract])) OR (intracranial cancer*[Title/Abstract])) OR (intracranial carcinoma*[Title/Abstract])) OR (intracranial malignan*[Title/Abstract])) OR (intracranial neoplasm*[Title/Abstract])) OR (intracranial tumor*[Title/Abstract])) OR (malignant brain*[Title/Abstract])) OR (malignant glia*[Title/Abstract])) OR (Pinealomas[Title/Abstract])) OR (Pituitary cancer*[Title/Abstract])) OR (Pituitary neoplasm*[Title/Abstract])) OR (Pituitary tumor*[Title/Abstract])) OR (intracranial aneurysm*[Title/Abstract])) OR (cerebral aneurysm*[Title/Abstract])) OR (brain aneurysm*[Title/Abstract])) OR (meningioma*[Title/Abstract]) | 199728 |
| #8 | #1 OR #2 OR #3 OR #4 OR #5 OR #6 OR #7 | 330298 |
| #9 | "Family"[MeSH Terms] | 397360 |
| #10 | "Caregivers"[MeSH Terms] | 60152 |
| #11 | "Spouses"[MeSH Terms] | 12562 |
| #12 | "Interpersonal Relations"[MeSH Terms] | 366979 |
| #13 | "Adult Children"[MeSH Terms] | 2063 |
| #14 | "Marriage"[MeSH Terms] | 25827 |
| #15 | ((((((((((((((((((((((((((((((((((((((famil*[Title/Abstract]) OR (dyad*[Title/Abstract])) OR (spouse*[Title/Abstract])) OR (couple*[Title/Abstract])) OR (caregiver*[Title/Abstract])) OR (carer*[Title/Abstract])) OR (care giver*[Title/Abstract])) OR (care-giver*[Title/Abstract])) OR (caretaker*[Title/Abstract])) OR (receiver*[Title/Abstract])) OR (partner*[Title/Abstract])) OR (recipient*[Title/Abstract])) OR (husband*[Title/Abstract])) OR (wife[Title/Abstract])) OR (wives[Title/Abstract])) OR (child*[Title/Abstract])) OR (son[Title/Abstract])) OR (sons[Title/Abstract])) OR (daughter*[Title/Abstract])) OR (partnership[Title/Abstract])) OR (significant other[Title/Abstract])) OR (close person*[Title/Abstract])) OR (cohabita*[Title/Abstract])) OR (marri*[Title/Abstract])) OR (wedded*[Title/Abstract])) OR (committed relationship[Title/Abstract])) OR (non-professional[Title/Abstract])) OR (informal[Title/Abstract])) OR (interpersonal relation*[Title/Abstract])) OR (interdepend*[Title/Abstract])) OR (family member*[Title/Abstract])) OR (informal caregiver*[Title/Abstract])) OR (family caregiver*[Title/Abstract])) OR (home-dwelling caregiver*[Title/Abstract])) OR (home care service*[Title/Abstract])) OR (parent*[Title/Abstract])) OR (filiation kinship networks[Title/Abstract])) OR (kinship network[Title/Abstract])) OR (family life cycles[Title/Abstract]) | 4619360 |
| #16 | #9 OR #10 OR #11 OR #12 OR #13 OR #14 OR #15 | 4981260 |
| #17 | "Qualitative Research"[MeSH Terms] | 113623 |
| #18 | "Observation"[MeSH Terms] | 5939 |
| #19 | "Interviews as Topic"[MeSH Terms] | 78754 |
| #20 | "Narration"[MeSH Terms] | 11934 |
| #21 | "Focus Groups"[MeSH Terms] | 43712 |
| #22 | "Grounded Theory"[MeSH Terms] | 3550 |
| #23 | (((((((((((((((((((((((((((((((((((qualitative[Title/Abstract]) OR (phenomeno*[Title/Abstract])) OR (ethnogra*[Title/Abstract])) OR (emic[Title/Abstract])) OR (etic[Title/Abstract])) OR (heidegger*[Title/Abstract])) OR (husserl*[Title/Abstract])) OR (colaizzi*[Title/Abstract])) OR (giorgi*[Title/Abstract])) OR (glaser[Title/Abstract])) OR (van kaam*[Title/Abstract])) OR (van manen[Title/Abstract])) OR (constant compar*[Title/Abstract])) OR (field study[Title/Abstract])) OR (field note*[Title/Abstract])) OR (field record*[Title/Abstract])) OR (grounded theory[Title/Abstract])) OR (focus group[Title/Abstract])) OR (narrative[Title/Abstract])) OR (interview*[Title/Abstract])) OR (action research[Title/Abstract])) OR (participant observ*[Title/Abstract])) OR (nonparticipant observ*[Title/Abstract])) OR (non participant observ*[Title/Abstract])) OR (mixed methods[Title/Abstract])) OR (hermeneutic[Title/Abstract])) OR (content analy*[Title/Abstract])) OR (thematic analy*[Title/Abstract])) OR (discourse analy*[Title/Abstract])) OR (audio record*[Title/Abstract])) OR (tape record*[Title/Abstract])) OR (video record*[Title/Abstract])) OR (digital record*[Title/Abstract])) OR (conversation analy*[Title/Abstract])) OR (historic research[Title/Abstract])) OR (historic study[Title/Abstract]) | 1260800 |
| #24 | #17 OR #18 OR #19 OR #20 OR #21 OR #22 OR #23 | 1294740 |
| #25 | #8 AND #16 AND #24 | 1342 |
| Web of Science (Core Collection) | | |
| #1 | ((((((((((((((((((((((((((((((((((((((((((((((((TS=(Brain Neoplasms)) OR TS=(Glioma*)) OR TS=(Meningioma*)) OR TS=(Pituitary Neoplasms*)) OR TS=(Craniopharyngioma)) OR TS=(Intracranial Aneurysm)) OR TS=(brain cancer*)) OR TS=(brain carcinoma*)) OR TS=(brain malign*)) OR TS=(brain neoplasm*)) OR TS=(brain tumor*)) OR TS=(Brain Stem neoplasm*)) OR TS=(Brain Stem tumor*)) OR TS=(cancer of brain)) OR TS=(cancer of the brain)) OR TS=(cancer of the central nervous system)) OR TS=(central nervous system cancer*)) OR TS=(central nervous system malignan*)) OR TS=(central nervous system neoplasm*)) OR TS=(central nervous system tumor*)) OR TS=(Cerebellar cancer)) OR TS=(Cerebellar neoplasm)) OR TS=(Cerebellar tumor*)) OR TS=(cerebral cancer*)) OR TS=(cerebral carcinoma*)) OR TS=(cerebral malignan*)) OR TS=(cerebral neoplasm*)) OR TS=(cerebral* tumor*)) OR TS=(ependymom*)) OR TS=(ganglioglioma*)) OR TS=(hypothalamic neoplasm*)) OR TS=(hypothalamic tumor)) OR TS=(intracerebral cancer*)) OR TS=(intracerebral malignan*)) OR TS=(intracerebral neoplasm*)) OR TS=(intracerebral tumor*)) OR TS=(intracranial cancer*)) OR TS=(intracranial carcinoma*)) OR TS=(intracranial malignan*)) OR TS=(intracranial neoplasm*)) OR TS=(intracranial tumor*)) OR TS=(malignant brain*)) OR TS=(malignant glia*)) OR TS=(Pinealomas)) OR TS=(Pituitary cancer*)) OR TS=(Pituitary tumor*)) OR TS=(intracranial aneurysm*)) OR TS=(cerebral aneurysm*)) OR TS=(brain aneurysm*) | 339664 |
| #2 | (((((((((((((((((((((((((((((((((((((((TS=(famil*)) OR TS=(dyad*)) OR TS=(spouse*)) OR TS=(couple*)) OR TS=(caregiver*)) OR TS=(carer*)) OR TS=(care giver*)) OR TS=(care-giver*)) OR TS=(caretaker*)) OR TS=(receiver*)) OR TS=(partner*)) OR TS=(recipient*)) OR TS=(husband*)) OR TS=(wife)) OR TS=(wives)) OR TS=(child*)) OR TS=(son)) OR TS=(sons)) OR TS=(daughter*)) OR TS=(partnership)) OR TS=(significant other)) OR TS=(close person*)) OR TS=(cohabita*)) OR TS=(marri*)) OR TS=(wedded*)) OR TS=(committed relationship)) OR TS=(non-professional)) OR TS=(informal)) OR TS=(interpersonal relation*)) OR TS=(interdepend*)) OR TS=(family member*)) OR TS=(informal caregiver*)) OR TS=(family caregiver*)) OR TS=(home-dwelling caregiver*)) OR TS=(home care service*)) OR TS=(parent*)) OR TS=(filiation kinship networks)) OR TS=(kinship network)) OR TS=(family life cycles)) OR TS=(Adult Children) | 6604818 |
| #3 | (((((((((((((((((((((((((((((((((((((((TS=(Qualitative Research)) OR TS=(Observation)) OR TS=(Interviews as Topic)) OR TS=(Narration)) OR TS=(qualitative)) OR TS=(phenomeno*)) OR TS=(ethnogra*)) OR TS=(emic)) OR TS=(etic)) OR TS=(heidegger*)) OR TS=(husserl*)) OR TS=(colaizzi*)) OR TS=(giorgi*)) OR TS=(glaser)) OR TS=(van kaam*)) OR TS=(van manen)) OR TS=(constant compar*)) OR TS=(field study)) OR TS=(field note*)) OR TS=(field record*)) OR TS=(grounded theory)) OR TS=(focus group*)) OR TS=(narrative)) OR TS=(interview*)) OR TS=(action research)) OR TS=(participant observ*)) OR TS=(nonparticipant observ*)) OR TS=(non participant observ*)) OR TS=(mixed methods)) OR TS=(hermeneutic)) OR TS=(content analy*)) OR TS=(thematic analy*)) OR TS=(discourse analy*)) OR TS=(audio record*)) OR TS=(tape record*)) OR TS=(video record*)) OR TS=(digital record*)) OR TS=(conversation analy*)) OR TS=(historic research)) OR TS=(historic study) | 6470019 |
| #4 | #1 AND #2 AND #3 | 7033 |
| Embase | | |
| #1 | 'brain tumor'/exp | 278772 |
| #2 | 'glioma'/exp | 214307 |
| #3 | 'meningioma'/exp | 45593 |
| #4 | 'hypophysis tumor'/exp | 74094 |
| #5 | 'craniopharyngioma'/exp | 10878 |
| #6 | 'intracranial aneurysm'/exp | 47529 |
| #7 | 'brain cancer*':ab,ti OR 'brain carcinoma*':ab,ti OR 'brain malign*':ab,ti OR 'brain neoplasm*':ab,ti OR 'brain tumor*':ab,ti OR 'brain stem neoplasm*':ab,ti OR 'brain stem tumor*':ab,ti OR 'cancer of brain':ab,ti OR 'cancer of the brain':ab,ti OR 'cancer of the central nervous system':ab,ti OR 'central nervous system cancer*':ab,ti OR 'central nervous system malignan*':ab,ti OR 'central nervous system neoplasm*':ab,ti OR 'central nervous system tumor*':ab,ti OR 'cerebellar cancer':ab,ti OR 'cerebellar neoplasm':ab,ti OR 'cerebellar tumor*':ab,ti OR 'cerebral cancer*':ab,ti OR 'cerebral carcinoma*':ab,ti OR 'cerebral malignan*':ab,ti OR 'cerebral neoplasm*':ab,ti OR 'cerebral* tumor*':ab,ti OR ependymom*:ab,ti OR ganglioglioma*:ab,ti OR glioma*:ab,ti OR 'hypothalamic neoplasm*':ab,ti OR 'hypothalamic tumor':ab,ti OR 'intracerebral cancer*':ab,ti OR 'intracerebral malignan*':ab,ti OR 'intracerebral neoplasm*':ab,ti OR 'intracerebral tumor*':ab,ti OR 'intracranial cancer*':ab,ti OR 'intracranial carcinoma*':ab,ti OR 'intracranial malignan*':ab,ti OR 'intracranial neoplasm*':ab,ti OR 'intracranial tumor*':ab,ti OR 'malignant brain*':ab,ti OR 'malignant glia*':ab,ti OR pinealomas:ab,ti OR 'pituitary cancer*':ab,ti OR 'pituitary neoplasm*':ab,ti OR 'intracranial aneurysm*':ab,ti OR 'cerebral aneurysm*':ab,ti OR 'pituitary tumor*':ab,ti OR 'brain aneurysm*':ab,ti OR meningioma*:ab,ti | 269227 |
| #8 | #1 OR #2 OR #3 OR #4 OR #5 OR #6 OR #7 | 544328 |
| #9 | 'family'/exp | 699259 |
| #10 | 'caregiver'/exp | 157055 |
| #11 | 'spouse'/exp | 28972 |
| #12 | 'human relation'/exp | 1264976 |
| #13 | 'adult child'/exp | 2525 |
| #14 | 'marriage'/exp | 103604 |
| #15 | famil*:ab,ti OR dyad*:ab,ti OR spouse*:ab,ti OR couple*:ab,ti OR caregiver*:ab,ti OR carer*:ab,ti OR 'care giver*':ab,ti OR 'care-giver*':ab,ti OR caretaker*:ab,ti OR receiver*:ab,ti OR partner*:ab,ti OR recipient*:ab,ti OR husband*:ab,ti OR wife:ab,ti OR wives:ab,ti OR child*:ab,ti OR son:ab,ti OR sons:ab,ti OR daughter*:ab,ti OR partnership:ab,ti OR 'significant other':ab,ti OR 'close person*':ab,ti OR cohabita*:ab,ti OR marri*:ab,ti OR wedded*:ab,ti OR 'committed relationship':ab,ti OR 'non-professional':ab,ti OR informal:ab,ti OR 'interpersonal relation*':ab,ti OR interdepend*:ab,ti OR 'family member*':ab,ti OR 'informal caregiver*':ab,ti OR 'family caregiver*':ab,ti OR 'home-dwelling caregiver*':ab,ti OR 'home care service*':ab,ti OR parent*:ab,ti OR 'filiation kinship networks':ab,ti OR 'kinship network':ab,ti OR 'family life cycles':ab,ti | 6042782 |
| #16 | #9 OR #10 OR #11 OR #12 OR #13 OR #14 OR #15 | 7127095 |
| #17 | 'qualitative research'/exp | 162019 |
| #18 | 'observation'/exp | 13404 |
| #19 | 'interview'/exp | 470835 |
| #20 | 'verbal communication'/exp | 451490 |
| #21 | 'information processing'/exp | 3699036 |
| #22 | 'grounded theory'/exp | 12568 |
| #23 | qualitative:ab,ti OR phenomeno*:ab,ti OR ethnogra*:ab,ti OR emic:ab,ti OR etic:ab,ti OR heidegger*:ab,ti OR husserl*:ab,ti OR colaizzi*:ab,ti OR giorgi*:ab,ti OR glaser:ab,ti OR 'van kaam*':ab,ti OR 'van manen':ab,ti OR narrative:ab,ti OR 'constant compar*':ab,ti OR 'field study':ab,ti OR 'field note*':ab,ti OR 'field record*':ab,ti OR 'grounded theory':ab,ti OR 'focus group':ab,ti OR 'action research':ab,ti OR 'participant observ*':ab,ti OR 'nonparticipant observ*':ab,ti OR 'non participant observ*':ab,ti OR 'mixed methods':ab,ti OR 'content analy*':ab,ti OR 'thematic analy*':ab,ti OR 'discourse analy*':ab,ti OR 'audio record*':ab,ti OR 'tape record*':ab,ti OR interview*:ab,ti OR 'video record*':ab,ti OR 'digital record*':ab,ti OR 'conversation analy*':ab,ti OR 'historic research':ab,ti OR 'historic study':ab,ti OR hermeneutic:ab,ti | 1547368 |
| #24 | #17 OR #18 OR #19 OR #20 OR #21 OR #22 OR #23 | 5394066 |
| #25 | #8 AND #16 AND #24 AND [embase]/lim AND [humans]/lim AND 'article'/it AND [english]/lim | 5994 |
| CINAHL | | |
| #1 | SU brain neoplasms OR SU glioma* OR SU Meningioma* OR SU Pituitary Neoplasms* OR SU graniopharyngioma OR SU Intracranial Aneurysm OR SU brain cancer* OR SU brain carcinoma* OR SU brain malign* OR SU brain neoplasm* OR SU brain tumor* OR SU Brain Stem neoplasm* OR SU Brain Stem tumor* OR SU cancer of brain OR SU cancer of the brain OR SU cancer of the central nervous system OR SU central nervous system cancer* OR SU central nervous system malignan* OR SU central nervous system neoplasm* OR SU central nervous system tumor* OR SU Cerebellar cancer OR SU Cerebellar neoplasm OR SU Cerebellar tumor* OR SU cerebral cancer* OR SU cerebral carcinoma* OR SU cerebral malignan* OR SU cerebral neoplasm* OR SU cerebral* tumor* OR SU ependymom* OR SU ganglioglioma* OR SU hypothalamic neoplasm* OR SU hypothalamic tumor OR SU intracerebral cancer* OR SU intracerebral malignan* OR SU intracerebral neoplasm* OR SU intracerebral tumor* OR SU intracranial cancer* OR SU intracranial carcinoma* OR SU intracranial malignan* OR SU intracranial neoplasm* OR SU intracranial tumor* OR SU malignant brain* OR SU malignant glia* OR SU Pinealomas OR SU Pituitary cancer* OR SU Pituitary tumor* OR SU intracranial aneurysm* OR SU cerebral aneurysm* OR SU brain aneurysm* | 32384 |
| #2 | SU famil* OR SU dyad* OR SU spouse* OR SU couple* OR SU caregiver* OR SU carer* OR SU care giver* OR SU care-giver* OR SU caretaker* OR SU receiver* OR SU partner* OR SU recipient* OR SU husband* OR SU wife OR SU wives OR SU child* OR SU son OR SU sons OR SU daughter* OR SU partnership OR SU significant other OR SU close person* OR SU cohabita* OR SU marri* OR SU wedded* OR SU committed relationship OR SU non-professional OR SU informal OR SU interpersonal relation* OR SU interdepend* OR SU family member* OR SU informal caregiver* OR SU family caregiver* OR SU home-dwelling caregiver* OR SU home care service* OR SU parent* OR SU filiation kinship networks OR SU kinship network OR SU family life cycles OR SU Adult Children | 1170777 |
| #3 | SU Qualitative Research OR SU Observation OR SU Interviews as Topic OR SU Narration OR SU qualitative OR SU phenomeno* OR SU ethnogra* OR SU emic OR SU etic OR SU heidegger* OR SU husserl* OR SU colaizzi* OR SU giorgi* OR SU glaser OR SU van kaam* OR SU van manen OR SU constant compar* OR SU field study OR SU field note* OR SU field record* OR SU grounded theory OR SU focus group* OR SU narrative OR SU interview* OR SU action research OR SU participant observ* OR SU nonparticipant observ* OR SU non participant observ* OR SU mixed methods OR SU hermeneutic OR SU content analy* OR SU thematic analy* OR SU discourse analy* OR SU audio record* OR SU tape record* OR SU video record* OR SU digital record* OR SU conversation analy* OR SU historic research OR SU historic study | 459203 |
| #4 | #1 AND #2 AND #3 | 215 |
| Scopus | | |
| #1 | TITLE-ABS-KEY ( "Brain Neoplasms" OR Glioma* OR Meningioma* OR "Pituitary Neoplasms*" OR Craniopharyngioma OR "Intracranial Aneurysm" OR "brain cancer*" OR "brain carcinoma*" OR "brain malign*" OR "brain neoplasm*" OR "brain tumor*" OR "Brain Stem neoplasm*" OR "Brain Stem tumor*" OR "cancer of brain" OR "cancer of the brain" OR "cancer of the central nervous system" OR "central nervous system cancer*" OR "central nervous system malignan*" OR "central nervous system neoplasm*" OR "central nervous system tumor*" OR "Cerebellar cancer" OR "Cerebellar neoplasm" OR "Cerebellar tumor*" OR "cerebral cancer*" OR "cerebral carcinoma*" OR "cerebral malignan*" OR "cerebral neoplasm*" OR "cerebral* tumor*" OR ependymom* OR ganglioglioma* OR "hypothalamic neoplasm*" OR "hypothalamic tumor" OR "intracerebral cancer*" OR "intracerebral malignan*" OR "intracerebral neoplasm*" OR "intracerebral tumor*" OR "intracranial cancer*" OR "intracranial carcinoma*" OR "intracranial malignan*" OR "intracranial neoplasm*" OR "intracranial tumor*" OR "malignant brain*" OR "malignant glia*" OR Pinealomas OR "Pituitary cancer*" OR "Pituitary tumor*" OR "intracranial aneurysm*" OR "cerebral aneurysm*" OR "brain aneurysm*" ) | 404539 |
| #2 | TITLE-ABS-KEY ( famil* OR dyad* OR spouse* OR couple* OR caregiver* OR carer* OR "care giver*" OR "care-giver*" OR caretaker* OR receiver* OR partner* OR recipient* OR husband* OR wife OR wives OR child* OR son* OR daughter* OR partnership OR "significant other" OR "close person*" OR cohabita* OR marri* OR wedded* OR "committed relationship" OR "non-professional" OR informal OR "interpersonal relation*" OR interdepend* OR "family member*" OR "informal caregiver*" OR "family caregiver*" OR "home-dwelling caregiver*" OR "home care service*" OR parent* OR "filiation kinship networks" OR "kinship network" OR "family life cycles" OR "Adult Children" ) | 11883216 |
| #3 | TITLE-ABS-KEY ( "Qualitative Research" OR Observation OR "Interviews as Topic" OR Narration OR qualitative OR phenomeno* OR ethnogra* OR emic OR etic OR heidegger* OR husserl* OR colaizzi* OR giorgi* OR glaser OR "van kaam*" OR "van manen" OR "constant compar*" OR "field study" OR "field note*" OR "field record*" OR "grounded theory" OR "focus group*" OR narrative OR interview* OR "action research" OR "participant observ*" OR "nonparticipant observ*" OR "non participant observ*" OR "mixed methods" OR hermeneutic OR "content analy*" OR "thematic analy*" OR "discourse analy*" OR "audio record*" OR "tape record*" OR "video record*" OR "digital record*" OR "conversation analy*" OR "historic research" OR "historic study" ) | 7647242 |
| #4 | #1 AND #2 AND #3 AND ( LIMIT-TO ( DOCTYPE,"ar" ) ) AND ( LIMIT-TO ( LANGUAGE,"English" ) ) | 3864 |
| APA PsycInfo | | |
| #1 | SU brain neoplasms OR SU glioma* OR SU Meningioma* OR SU Pituitary Neoplasms* OR SU graniopharyngioma OR SU Intracranial Aneurysm OR SU brain cancer* OR SU brain carcinoma* OR SU brain malign* OR SU brain neoplasm* OR SU brain tumor* OR SU Brain Stem neoplasm* OR SU Brain Stem tumor* OR SU cancer of brain OR SU cancer of the brain OR SU cancer of the central nervous system OR SU central nervous system cancer* OR SU central nervous system malignan* OR SU central nervous system neoplasm* OR SU central nervous system tumor* OR SU Cerebellar cancer OR SU Cerebellar neoplasm OR SU Cerebellar tumor* OR SU cerebral cancer* OR SU cerebral carcinoma* OR SU cerebral malignan* OR SU cerebral neoplasm* OR SU cerebral* tumor* OR SU ependymom* OR SU ganglioglioma* OR SU hypothalamic neoplasm* OR SU hypothalamic tumor OR SU intracerebral cancer* OR SU intracerebral malignan* OR SU intracerebral neoplasm* OR SU intracerebral tumor* OR SU intracranial cancer* OR SU intracranial carcinoma* OR SU intracranial malignan* OR SU intracranial neoplasm* OR SU intracranial tumor* OR SU malignant brain* OR SU malignant glia* OR SU Pinealomas OR SU Pituitary cancer* OR SU Pituitary tumor* OR SU intracranial aneurysm* OR SU cerebral aneurysm* OR SU brain aneurysm* | 9081 |
| #2 | SU famil* OR SU dyad* OR SU spouse* OR SU couple* OR SU caregiver* OR SU carer* OR SU care giver* OR SU care-giver* OR SU caretaker* OR SU receiver* OR SU partner* OR SU recipient* OR SU husband* OR SU wife OR SU wives OR SU child* OR SU son OR SU sons OR SU daughter* OR SU partnership OR SU significant other OR SU close person* OR SU cohabita* OR SU marri* OR SU wedded* OR SU committed relationship OR SU non-professional OR SU informal OR SU interpersonal relation* OR SU interdepend* OR SU family member* OR SU informal caregiver* OR SU family caregiver* OR SU home-dwelling caregiver* OR SU home care service* OR SU parent* OR SU filiation kinship networks OR SU kinship network OR SU family life cycles OR SU Adult Children | 991583 |
| #3 | SU Qualitative Research OR SU Observation OR SU Interviews as Topic OR SU Narration OR SU qualitative OR SU phenomeno* OR SU ethnogra* OR SU emic OR SU etic OR SU heidegger* OR SU husserl* OR SU colaizzi* OR SU giorgi* OR SU glaser OR SU van kaam* OR SU van manen OR SU constant compar* OR SU field study OR SU field note* OR SU field record* OR SU grounded theory OR SU focus group* OR SU narrative OR SU interview* OR SU action research OR SU participant observ* OR SU nonparticipant observ* OR SU non participant observ* OR SU mixed methods OR SU hermeneutic OR SU content analy* OR SU thematic analy* OR SU discourse analy* OR SU audio record* OR SU tape record* OR SU video record* OR SU digital record* OR SU conversation analy* OR SU historic research OR SU historic study | 246775 |
| #4 | #1 AND #2 AND #3 | 70 |
